# Supplementary material for: A non-bioartificial liver support system combined with transplantation in HBV-related acute-on-chronic liver failure
Source: PubMed Central journal article supplement (PMC7859234; doi:10.1038/s41598-021-82719-x), 2021-02-03
Supplement: 41598_2021_82719_MOESM1_ESM.pdf [file 41598_2021_82719_MOESM1_ESM.pdf]

# **A non-bioartificial liver support system combined with transplantation in HBV-related acute-on-chronic liver failure**

Peng Li<sup>1</sup>, Xi Liang<sup>2</sup>, Shan Xu<sup>1</sup>, Ye Xiong<sup>1</sup>, Jianrong Huang<sup>1</sup>

## *Contents*

- Supplementary Figure 1: The clinical efficacy of each subgroup of artificial liver support system (ALSS).
- Supplementary Figure 2: Kaplan-Meier curves for the overall survival of patients in subgroups of ALSS after liver transplantation.
- Supplementary Figure 3: Kaplan-Meier curves for the 4-week survival after liver transplantation.
- Supplementary Table 1: Description of different modes of ALSS.
- Supplementary Table 2: CLIF-C OF score.
- Supplementary Table 3: Univariate and multivariate COX regression analysis investigating independent factors on 4-week prognosis in HBV-ACLF patients after LT.

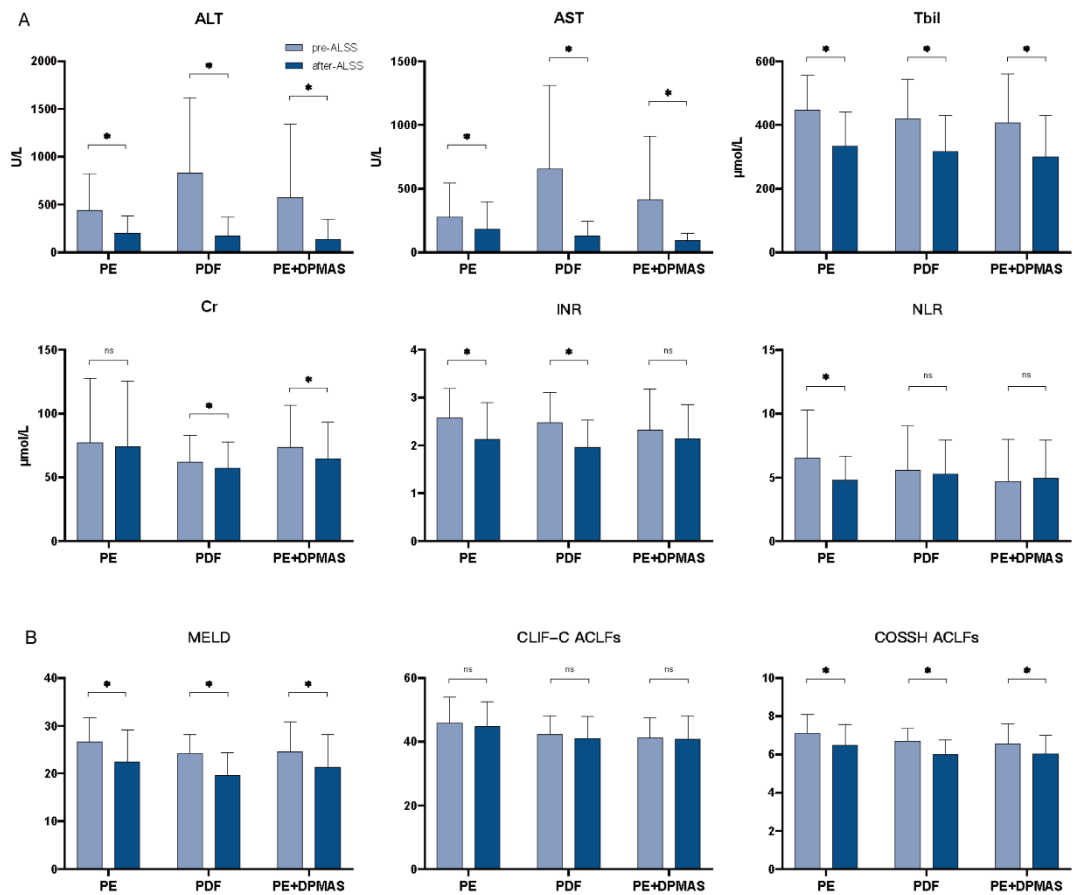

**Supplementary Fig 1.** The clinical efficacy of each subgroup of artificial liver support system (ALSS). (A)changes in laboratory parameters after ALSS; (B)changes in prognostic scores after ALSS. PE: plasma exchange; PDF: plasma diafiltration; DPMAS: double plasma molecular adsorption system; NLR: neutrophil-lymphocyte ratio; MELD: Model for end-stage liver disease; CLIF-C: chronic liver failure consortium; ACLF: acute-on-chronic liver failure; CLIF-C-ACLFs: CLIF-C ACLF score; CLIF-C-OFs: CLIF-C organ failure score; COSSH: Chinese Group on the Study of Severe Hepatitis B.

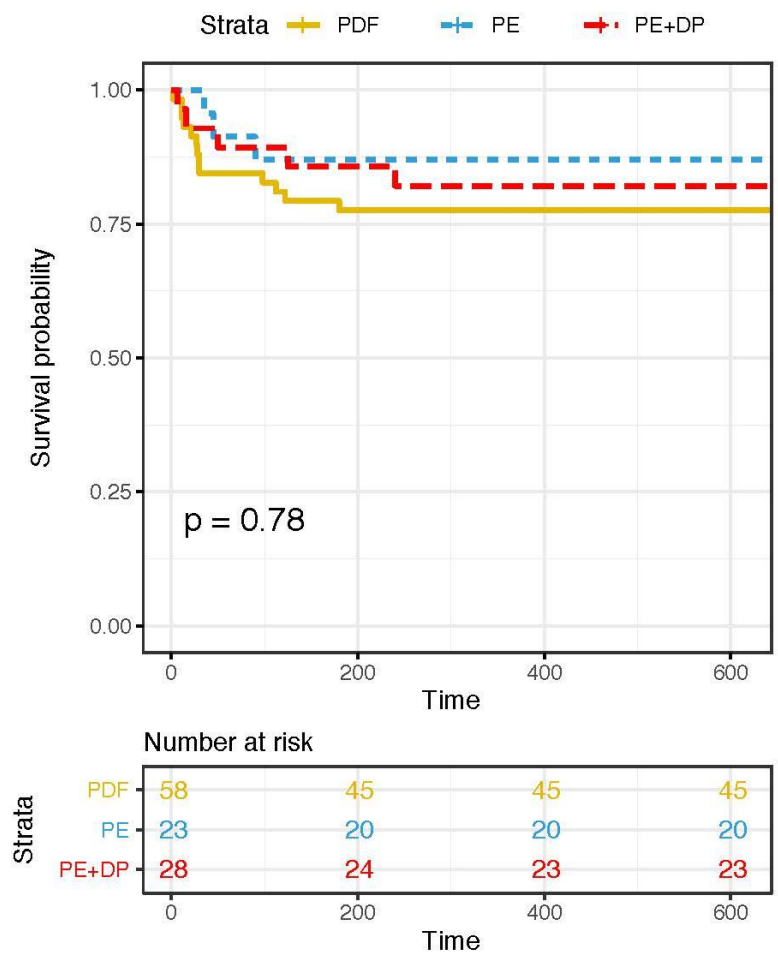

**Supplementary Fig 2.** Kaplan-Meier curves for the overall survival of patients in subgroups of ALSS after liver transplantation. PE: plasma exchange; PDF: plasma diafiltration; DPMAS; double plasma molecular adsorption system.

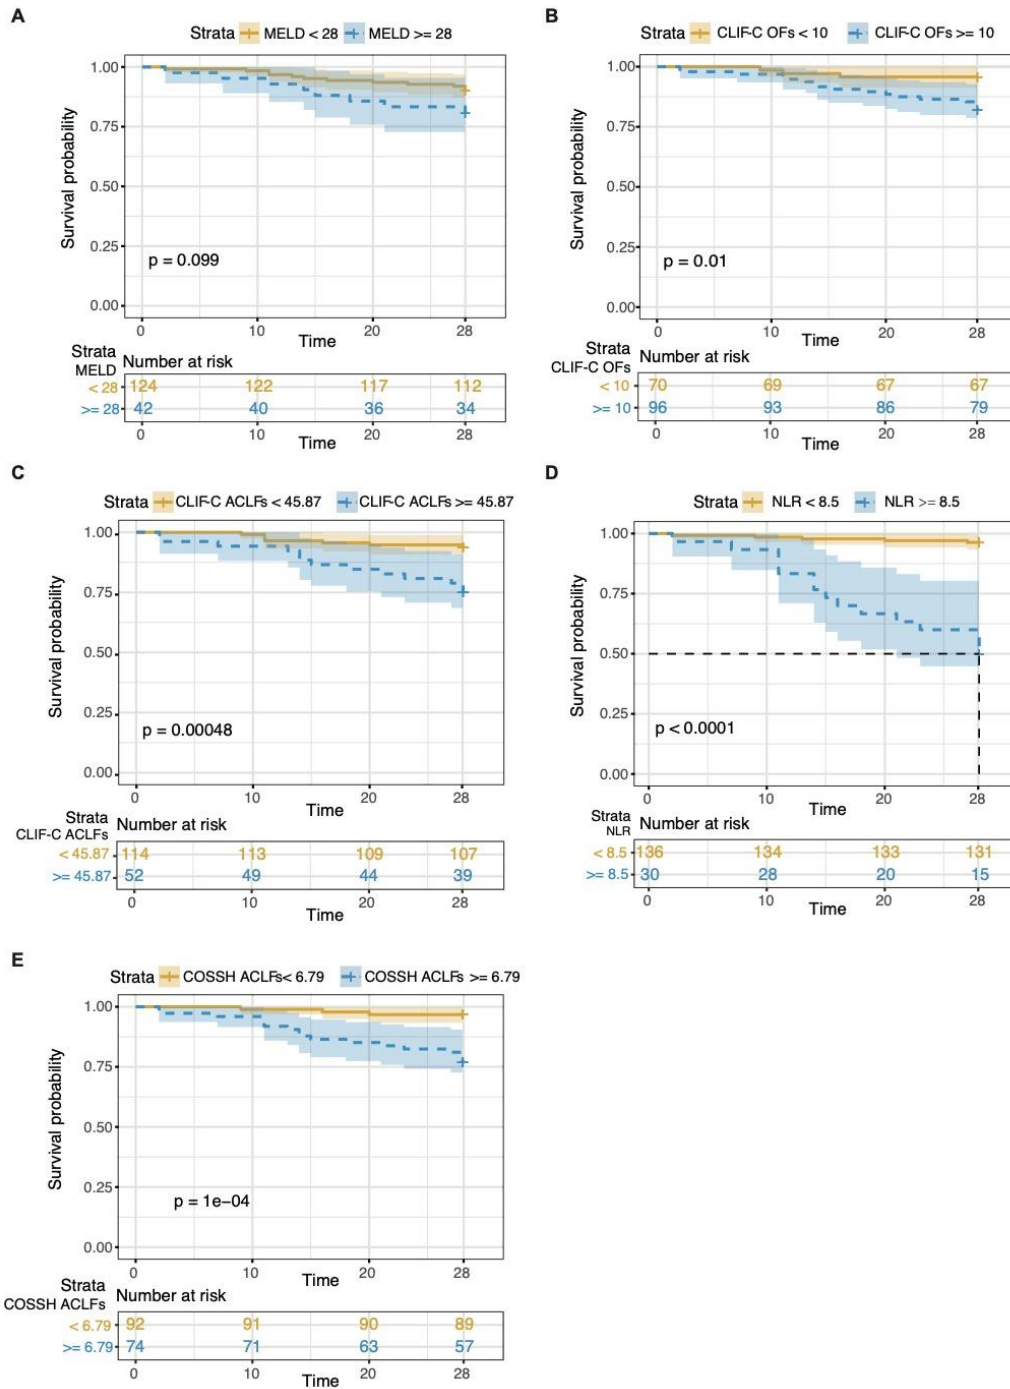

**Supplementary Fig 3.** Kaplan-Meier curves for the 4-week survival after liver transplantation. (A) MELD ≥28 or MELD <28; (B) CLIF-C OFs ≥10 or CLIF-C OFs <10; (C) CLIF-C ACLFs ≥ 45.87 or CLIF-C ACLFs <45.87; (D) NLR ≥8.5 or NLR <8.5; (E) COSSH-ACLFs ≥6.79 or COSSH-ACLFs <6.79. ACLF: acute-on-chronic liver failure; MELD: Model for end-stage liver disease; CLIF-C: chronic liver failure consortium; CLIF-C-ACLFs: CLIF-C ACLF score; CLIF-C-OFs: CLIF-C organ failure score; COSSH: Chinese Group on the Study of Severe Hepatitis B. COSSH ACLFs: COSSH ACLF score; NLR: neutrophil-lymphocyte ratio.

**Supplementary Table 1. Description of different modes of ALSS**

| Parameters               | Modes                                                                                                                                                                                                          |                                                                                                                                                               |                                                                                                |
|--------------------------|----------------------------------------------------------------------------------------------------------------------------------------------------------------------------------------------------------------|---------------------------------------------------------------------------------------------------------------------------------------------------------------|------------------------------------------------------------------------------------------------|
|                          | PE                                                                                                                                                                                                             | PDF                                                                                                                                                           | DPMAS                                                                                          |
| Blood flow rate (ml/min) | 100-120                                                                                                                                                                                                        | 120                                                                                                                                                           | 120                                                                                            |
| Rate (ml/min)            | Plasma exchange rate:18-25                                                                                                                                                                                     | Exchange rate:3-4<br>Dialysis rate:15-16<br>Filtration rate:10-12                                                                                             | Plasma separation:25-30                                                                        |
| Blood volume (ml)        | Exchange:2000-2500                                                                                                                                                                                             | Exchange:2000<br>Dialysis:8000<br>Filtration:4500-5000                                                                                                        | Plasma absorption:5000-6000                                                                    |
| Process                  | Remove metabolic toxins(small and medium molecules), protein-bound toxins(large molecules), supplement essential substances(such as albumin and coagulation factors), improve internal environment disturbance | Remove water-soluble substances: ammonia, aromatic amino acids and creatinine(medium and small molecules), maintain hemodynamic and electronic balance stable | Remove bilirubin, albumin-bound toxins and inflammation mediators (medium and large molecules) |
| Indications              | Coagulopathy, hyperbilirubinemia                                                                                                                                                                               | Hepatic encephalopathy, kidney failure and electrolyte disturbance                                                                                            | Hyperbilirubinemia                                                                             |

ALSS: artificial liver support system; PE: plasma exchange; PDF: plasma diafiltration; DPMAS; double plasma molecular adsorption system.

**Supplementary Table 2. CLIF-C OF score**

| <b>Organ/score</b>                 | <b>1</b> | <b>2</b>   | <b>3</b>     |
|------------------------------------|----------|------------|--------------|
| Liver (TBil)                       | <6mg/dl  | 6-12mg/dl  | ≥12mg/dl     |
| Kidney (creatinine)                | <2mg/dl  | 2-3.5mg/dl | ≥3.5mg/dl    |
| HE grade                           | 0        | 1-2        | 3-4          |
| Coagulation (INR)                  | <2.0     | 2.0-2.5    | ≥2.5         |
| Circulation (MAP)                  | ≥70mmHg  | <70mmHg    | Vasopressors |
| Respiratory                        |          |            |              |
| PaO <sub>2</sub> /FiO <sub>2</sub> | >300     | 200-300    | ≤200         |
| SpO <sub>2</sub> /FiO <sub>2</sub> | >357     | 214-357    | ≤214         |

TBil: total bilirubin; HE: hepatic encephalopathy; INR: international normalized ratio; MAP: mean arterial pressure; PaO<sub>2</sub>: partial pressure of oxygen; FiO<sub>2</sub>: fraction of inspired oxygen; SpO<sub>2</sub>: peripheral capillary oxygen saturation.

**Supplementary Table 3.** Univariate and multivariate COX regression analysis investigating independent factors on 4-week prognosis in HBV-ACLF patients after LT

| Variable                  | Comparison                     | Univariate analysis |        | Multivariate analysis |        |
|---------------------------|--------------------------------|---------------------|--------|-----------------------|--------|
|                           |                                | HR (95% CI)         | P      | HR (95% CI)           | P      |
| Age (years)               | Increase per year              | 1.06 (1.01-1.11)    | 0.017  | 1.934 (0.696-5.377)   | 0.206  |
| Sex                       | Male vs. female                | 0.76 (0.22-2.60)    | 0.45   |                       |        |
| ALT                       | Increase per U/L               | 1.00 (1.00-1.00)    | 0.623  |                       |        |
| TBil                      | Increase per $\mu\text{mol/L}$ | 1.00 (1.00-1.00)    | 0.362  |                       |        |
| AST                       | Increase per U/L               | 1.00 (1.00-1.00)    | 0.688  |                       |        |
| ALB                       | Increase per g/L               | 0.90 (0.82-1.00)    | 0.044  |                       |        |
| Cr                        | Increase per $\mu\text{mol/L}$ | 1.00 (1.00-1.01)    | 0.462  |                       |        |
| INR                       |                                | 1.26 (0.91-1.75)    | 0.168  | 2.60 (0.92-7.344)     | 0.071  |
| WBC                       | Increase per log /L            | 1.02 (0.91-1.13)    | 0.775  |                       |        |
| CRP                       | Increase per mg/L              | 1.15 (1.01-1.26)    | 0.051  |                       |        |
| HE                        | Increase per grade             | 1.48 (1.08-2.01)    | 0.013  | 1.366 (0.944-1.976)   | 0.098  |
| HRS                       | Yes or no                      | 1.33 (0.93-4.03)    | 0.928  |                       |        |
| Ascites                   | Yes or no                      | 4.12 (1.21-14.07)   | 0.024  |                       |        |
| ICU stay time             | Increase per day               | 1.01 (0.95-1.07)    | 0.698  |                       |        |
| Intraoperative blood loss | Increase per 500 ml            | 1.21 (1.01-1.53)    | 0.023  | 1.418 (1.128-1.784)   | 0.003  |
| ALSS pre-LT               | Yes or no                      | 0.41 (0.17-0.98)    | 0.046  | 0.314 (0.128-0.773)   | 0.012  |
| NLR                       | Increase per ratio             | 1.33 (1.21-1.47)    | <0.001 | 1.266 (1.119-1.431)   | <0.001 |
| MELDs                     |                                | 1.07 (1.01- 1.15)   | 0.032  |                       |        |
| COSSH ACLFs               |                                | 1.57 (1.17- 2.12)   | 0.003  |                       |        |
| CLIF-C OFs                |                                | 1.49 (1.05- 2.11)   | 0.024  |                       |        |
| CLIF-C ACLFs              |                                | 1.09 (1.03- 1.16)   | 0.005  |                       |        |

ALT: alanine aminotransferase; AST: aspartate aminotransferase; ALB: albumin; TBil: total bilirubin; Cr: creatinine; INR: international normalized ratio; WBC: White blood cell; CRP: C-reactive protein; HE: hepatic encephalopathy; HRS: hepatorenal syndrome; ACLF: acute-on-chronic liver failure; ALSS: artificial liver support system; LT: liver

transplantation; NLR: neutrophil-lymphocyte ratio; MELD: Model for end-stage liver disease; CLIF-C: chronic liver failure consortium; CLIF-C ACLFs: CLIF-C ACLF score; CLIF-C OFs: CLIF-C organ failure score; COSSH: Chinese Group on the Study of Severe Hepatitis B; HR: hazard ratio; 95% CI: 95% confidence interval.
